# Supplementary material for: Photooxidation of 2,2′-(Ethyne-1,2-diyl)dianilines: An Enhanced Photocatalytic Properties of New Salophen-Based Zn(II) Complexes
Source: MDPI journal article supplement (doi:10.3390/photochem2020025), 2022-05-23
Supplement: s1 [file s1]

Archive with 1 entries (1 files):
- photochem-1682363-supplementary.pdf
