# Supplementary material for: Photooxidation of 2,2′-(Ethyne-1,2-diyl)dianilines: An Enhanced Photocatalytic Properties of New Salophen-Based Zn(II) Complexes
Source: MDPI journal article supplement (doi:10.3390/photochem2020025), 2022-05-23
Supplement: s1 [file s1 › photochem-1682363-supplementary.pdf]

## Supplementary Information

### Photooxidation of 2,2'-(ethyne-1,2-diyl)dianilines; An Enhanced Photocatalytic Properties of New Salophen based Zn (II) Complexes

#### *Photooxidation of 2,2'-(ethyne-1,2-diyl)dianilines*

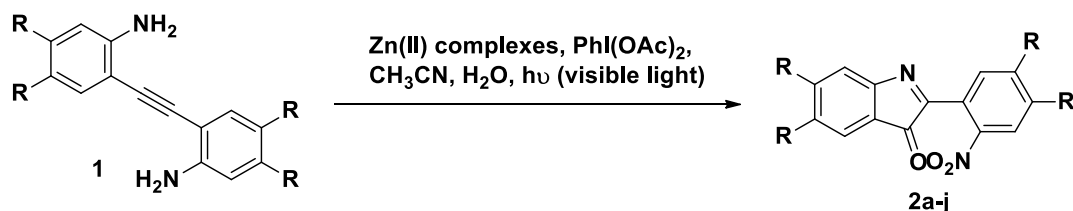

Scheme S1. Synthesis process for 2-(2-nitrophenyl)-3H-indol-3-one and its derivatives

Synthetic route for the photooxidation reactions using 2,2'-(ethyne-1,2-diyl)dianiline and its derivatives is depicted in scheme 3 and are carried out with the following procedure;

#### *Synthesis of 2-(2-nitrophenyl)-3H-indol-3-one and its derivatives (2a- 2j)*

The quartz tube charged with 2,2'-(ethyne-1,2-diyl)dianiline (10 mmol) in 20 mL of water and CH<sub>3</sub>CN (1:1) mixture, stirred for 15 minutes. Then (0.02 mmol) Zn (II) complex ([Zn(CPAMN)] / [Zn(FPAMN)] / [Zn(MPAMN)]) with an oxidant (Diacetoxiyodo)benzene (1:2) was added to the reaction mass and examined under visible light irradiation (500 watt tungsten visible light). After 24 hours, TLC (in 50:50 dichloromethane-hexane) exhibited a new mark at R<sub>f</sub> 0.54 which indicates the product is formed. Then the light was turned off, and the reaction mixture temperature was reduced to room temperature and thinned with dichloromethane and separated the OL. The MgSO<sub>4</sub> was added to OL, filtered and the solvent was evaporated under vacuum. Then the crude compounds were purified by flash chromatography on silica gel using 10:90 methanol-dichloromethane as eluent.

#### **Analytical data:**

##### **2-(2-nitrophenyl)-3H-indol-3-one (compound 2a):**

The purification of the crude material by column chromatography gave a pure product with 84 % yield. M.P: 209 -211 °C (recrystallized from methanol); <sup>1</sup>H-NMR (400 MHz, CDCl<sub>3</sub>), δ (ppm):

8.604 (m, 1H, Ar-*H*), 8.252 (m, 1H, Ar-*H*), 8.163 (m, 1H, Ar-*H*), 8.064 (m, 1H, Ar-*H*), and 7.794 – 7.662 (m, 4H, Ar-*H*); HRMS calcd. For  $C_{14}H_8N_2O_3^+$ : 253.0529 ( $M^++1$ ) found: 252.0535 ( $M^+$ ).

**2-(4,5-dimethyl-2-nitrophenyl)-5,6-dimethyl-3H-indol-3-one (compound 2b)**

The purification of the crude material by column chromatography gave a pure product with 90 % yield. M.P: 234 -236 °C (recrystallized from ethanol);  $^1H$ -NMR (400 MHz,  $CDCl_3$ ),  $\delta$  (ppm): 8.164 (s, 1H, Ar-*H*), 7.956 (s, 1H, Ar-*H*), 7.684 (s, 1H, Ar-*H*), 7.668 (s, 1H, Ar-*H*), 2.546 (s, 3H,  $CH_3$ ), and 2.464 (s, 3H,  $CH_3$ ); HRMS calcd. For  $C_{18}H_{16}N_2O_3^+$ : 308.1161 [ $M$ ] $^+$  found: 309.1157 [ $M+1$ ] $^+$ .

**5,6-dichloro-2-(4,5-dichloro-2-nitrophenyl)-3H-indol-3-one (compound 2c):**

The purification of the crude material by column chromatography gave a pure product with 79 % yield. M.P: 256 -258 °C;  $^1H$ -NMR (400 MHz,  $CDCl_3$ ),  $\delta$  (ppm): 8.794 (s, 1H, Ar-*H*), 8.164 (s, 1H, Ar-*H*), 7.846 (s, 1H, Ar-*H*), and 7.578 (s, 1H, Ar-*H*); HRMS calcd. For  $C_{14}H_4Cl_4N_2O_3^+$ : 387.8976 [ $M$ ] $^+$  found: 388.8982 [ $M+1$ ] $^+$ .

**5,6-difluoro-2-(4,5-difluoro-2-nitrophenyl)-3H-indol-3-one (compound 2d):**

The purification of the crude material by column chromatography gave a pure product with 81 % yield. M.P: 262 -264 °C;  $^1H$ -NMR (400 MHz,  $d_6$ -DMSO),  $\delta$  (ppm): 8.186 (m, 1H, Ar-*H*), 8.062 (m, 1H, Ar-*H*), 7.586 (m, 1H, Ar-*H*), and 7.464 (m, 1H, Ar-*H*); HRMS calcd. For  $C_{14}H_4F_4N_2O_3^+$ : 324.0158 [ $M$ ] $^+$  found: 325.0151 [ $M+1$ ] $^+$ .

**5-fluoro-2-(5-fluoro-4-methoxy-2-nitrophenyl)-6-methoxy-3H-indol-3-one (compound 2e):**

The purification of the crude material by column chromatography gave a pure product with 85 % yield. M.P: 222 - 224 °C;  $^1H$ -NMR (400 MHz,  $CDCl_3$ ),  $\delta$  (ppm): 8.194 (m, 1H, Ar-*H*), 7.754 (m, 1H, Ar-*H*), 7.598 (m, 1H, Ar-*H*), 7.312 (m, 1H, Ar-*H*), and 4.128 (s, 6H, Ar- $OCH_3$ ); HRMS calcd. For  $C_{16}H_{10}F_2N_2O_5^+$ : 348.0558 [ $M$ ] $^+$  found: 349.0549 [( $M+1$ )] $^+$ .

**5-chloro-2-(5-chloro-4-methoxy-2-nitrophenyl)-6-methoxy-3H-indol-3-one (compound 2f):**

The purification of the crude material by column chromatography gave a pure product with 86 % yield. M.P: 261 -263 °C;  $^1H$ -NMR (400 MHz,  $CDCl_3$ ),  $\delta$  (ppm): 8.228 (s, 1H Ar-*H*), 8.042 (s, 1H, Ar-*H*), 7.884 (s, 1H, Ar-*H*), 7.586 (s, H, Ar-*H*), and 4.168 (s, 6H, Ar- $OCH_3$ ); HRMS calcd. For  $C_{16}H_{10}Cl_2N_2O_5^+$ : 379.9967 [ $M$ ] $^+$  found: 380.9963 [( $M+1$ )] $^+$ .

**2-(4,5-dicyano-2-nitrophenyl)-3-oxo-3H-indole-5,6-dicarbonitrile (compound 2g):**

The purification of the crude material by column chromatography gave a pure product with 69 % yield. M.P: 208 -210 °C; <sup>1</sup>H-NMR (400 MHz, *d*<sub>6</sub>-DMSO),  $\delta$  (ppm): 9.158 (s, 1H, Ar-*H*), 8.636 (s, 1H, Ar-*H*), 8.366 (s, 1H, Ar-*H*) and 7.962 (s, 1H, Ar-*H*); HRMS cald. For C<sub>18</sub>H<sub>4</sub>N<sub>6</sub>O<sub>3</sub><sup>+</sup>: 352.0345 [M]<sup>+</sup> found: 353.0339 [M+1]<sup>+</sup>.

**2-(5-cyano-2-nitrophenyl)-3-oxo-3H-indole-5-carbonitrile (compound 2h):**

The purification of the crude material by column chromatography gave a pure product with 74 % yield. M.P: 202 – 204 °C; <sup>1</sup>H-NMR (400 MHz, CDCl<sub>3</sub>),  $\delta$  (ppm): 8.364 (s, 1H, Ar-*H*), 8.194 (s, 1H, Ar-*H*), 8.127 (d, 1H, J = 12 Hz, Ar-*H*), 7.937 (d, 1H, J = 11 Hz, Ar-*H*), 7.812 (d, 1H, J = 16 Hz, Ar-*H*), and 7.784 (d, 1H, J = 14 Hz, Ar-*H*); HRMS cald. For C<sub>16</sub>H<sub>6</sub>N<sub>4</sub>O<sub>3</sub><sup>+</sup>: 302.0440 [M]<sup>+</sup> found: 303.0436 [M+1]<sup>+</sup>.

**6-chloro-2-(4-chloro-5-methyl-2-nitrophenyl)-5-methyl-3H-indol-3-one (compound 2i):**

The purification of the crude material by column chromatography gave a pure product with 87 % yield. M.P: 218 – 220 °C; <sup>1</sup>H-NMR (400 MHz, CDCl<sub>3</sub>),  $\delta$  (ppm): 7.996 (s, 1H, Ar-*H*), 7.792 (s, 1H, Ar-*H*), 7.552 (s, 1H, Ar-*H*), 7.205 (s, 1H, Ar-*H*), and 2.548 (s, 6H, CH<sub>3</sub>); HRMS cald. For C<sub>16</sub>H<sub>10</sub>Cl<sub>2</sub>N<sub>2</sub>O<sub>3</sub><sup>+</sup>: 348.0068 [M]<sup>+</sup> found: 349.0063 [M+1]<sup>+</sup>.

**2-(2-nitro-4,5-bis(trifluoromethyl)phenyl)-5,6-bis(trifluoromethyl)-3H-indol-3-one (compound 2j)**

The purification of the crude material by column chromatography gave a pure product with 64 % yield. M.P: 286 - 288 °C; <sup>1</sup>H-NMR (400 MHz, *d*<sub>6</sub>-DMSO),  $\delta$  (ppm): 8.386 (s, 1H, Ar-*H*), 8.188 (s, 1H, Ar-*H*), 7.882 (s, 1H, Ar-*H*), and 7.786 (s, 1H, Ar-*H*); HRMS cald. For C<sub>18</sub>H<sub>4</sub>F<sub>12</sub>N<sub>2</sub>O<sub>3</sub><sup>+</sup>: 524.0030 [M]<sup>+</sup> found: 525.0027 [M+1]<sup>+</sup>.

**Table S1. Analytical and Physicochemical data of Zn(II) complexes**

| Compound                                                                 | % Yield | M.P/<br>D.P.<br>(°C) | %C<br>(calcd)    | %H<br>(calcd)  | %X<br>(calcd)          | %N<br>(calcd)  | % Zn<br>(calcd) | $\Lambda_m$<br>ohm <sup>-1</sup><br>mol <sup>-1</sup><br>cm <sup>2</sup><br>(DMF) |
|--------------------------------------------------------------------------|---------|----------------------|------------------|----------------|------------------------|----------------|-----------------|-----------------------------------------------------------------------------------|
| CPAMN<br>C <sub>28</sub> H <sub>19</sub> ClN <sub>2</sub> O <sub>2</sub> | 90      | 256                  | 74.52<br>(74.58) | 4.22<br>(4.25) | 7.83<br>(Cl)<br>(7.86) | 6.15<br>(6.21) | --              | ---                                                                               |

|                                                                                   |    |     |                  |                |                        |                |                  |       |
|-----------------------------------------------------------------------------------|----|-----|------------------|----------------|------------------------|----------------|------------------|-------|
| FPAMN<br>C <sub>28</sub> H <sub>19</sub> FN <sub>2</sub> O <sub>2</sub>           | 88 | 238 | 77.34<br>(77.41) | 4.38<br>(4.41) | 4.33<br>(F)<br>(4.37)  | 6.39<br>(6.45) | --               | --    |
| MPAMN<br>C <sub>29</sub> H <sub>22</sub> N <sub>2</sub> O <sub>3</sub>            | 85 | 218 | 77.97<br>(78.01) | 4.93<br>(4.97) | 6.21<br>(6.27)         | 6.21<br>(6.27) | --               | --    |
| [Zn(CPAMN)]<br>C <sub>28</sub> H <sub>17</sub> ClN <sub>2</sub> O <sub>2</sub> Zn | 64 | 363 | 65.34<br>(65.39) | 3.29<br>(3.33) | 6.85<br>(Cl)<br>(6.89) | 5.39<br>(5.45) | 12.67<br>(12.71) | 12.49 |
| [Zn(FPAMN)]<br>C <sub>28</sub> H <sub>17</sub> FN <sub>2</sub> O <sub>2</sub> Zn  | 71 | 349 | 67.51<br>(67.55) | 3.41<br>(3.44) | 3.78<br>(F)<br>(3.82)  | 5.59<br>(5.63) | 13.08<br>(13.13) | 15.04 |
| [Zn(MPAMN)]<br>C <sub>29</sub> H <sub>20</sub> N <sub>2</sub> O <sub>3</sub> Zn   | 75 | 359 | 68.28<br>(68.31) | 3.92<br>(3.95) | ---                    | 5.46<br>(5.49) | 12.78<br>(12.82) | 16.19 |

**Table S2. Thermal data of Zn (II) complexes**

| S.No. | Complex     | Thermal Process     | Temperature<br>Range, °C | Pyrolysis<br>product, % |       |
|-------|-------------|---------------------|--------------------------|-------------------------|-------|
|       |             |                     |                          | Found                   | Calcd |
| 1     | [Zn(CPAMN)] | [Zn(CPAMN)] → [ZnO] | 268.15 – 677.82          | 83.58                   | 84.12 |
| 2     | [Zn(FPAMN)] | [Zn(FPAMN)] → [ZnO] | 276.28 – 682.45          | 83.06                   | 83.59 |
| 3     | [Zn(MPAMN)] | [Zn(MPAMN)] → [ZnO] | 256.82 – 658.68          | 83.63                   | 83.98 |

**Table S3. Electronic excitations ( $\lambda_{CAL}$  in nm) oscillator strength ( $f$ ) major transitions (MT) and % weight (%Ci) of ligands and complexes at TD-B3LYP/6-31G (d, p) method.**

| NAME  | $\lambda_{CAL}$ (nm) | $f$   | MT  | %Ci |
|-------|----------------------|-------|-----|-----|
| CPAMN | 437                  | 0.226 | H→L | 93  |

|             |     |       |     |    |
|-------------|-----|-------|-----|----|
| FPAMN       | 442 | 0.215 | H→L | 93 |
| MPAMN       | 455 | 0.183 | H→L | 95 |
| [Zn(CPAMN)] | 453 | 0.410 | H→L | 99 |
| [Zn(FPAMN)] | 456 | 0.367 | H→L | 98 |
| [Zn(MPAMN)] | 459 | 0.316 | H→L | 99 |

**Table S4. Molecular orbitals pictures of HOMO LUMO for ligands and Zn (II) complexes:**

| NAME  | HOMO                                                                                | LUMO                                                                                 |
|-------|-------------------------------------------------------------------------------------|--------------------------------------------------------------------------------------|
| CPAMN | 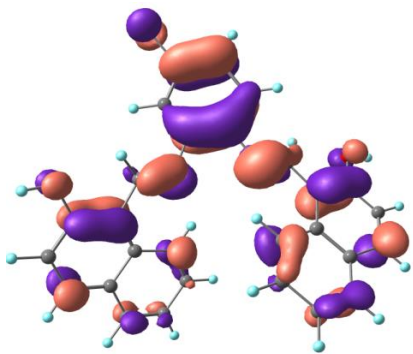   | 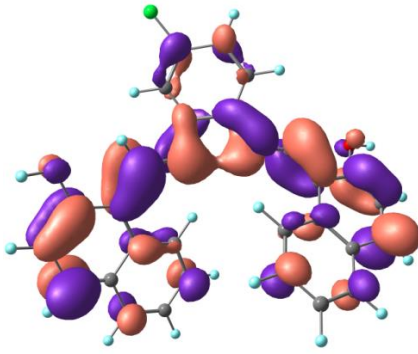   |
| FPAMN | 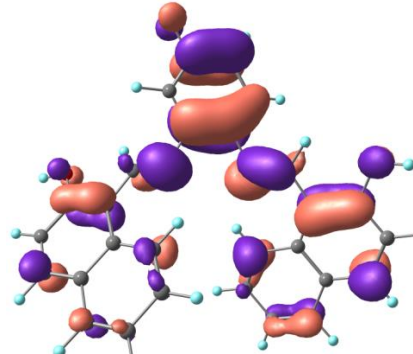  | 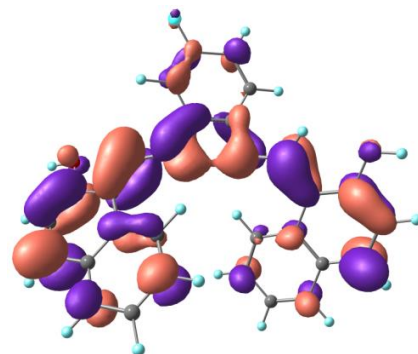  |
| MPAMN | 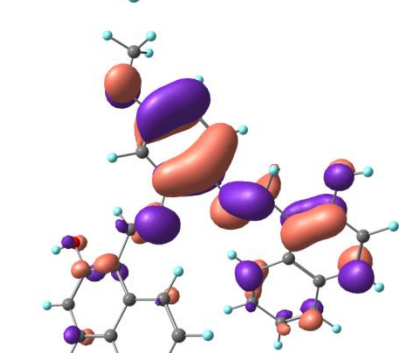 | 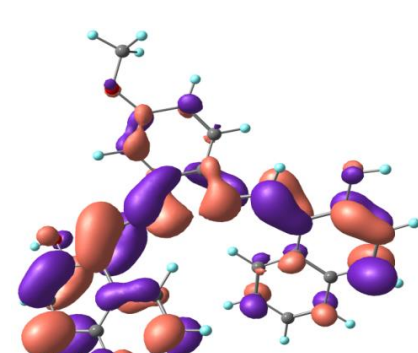 |

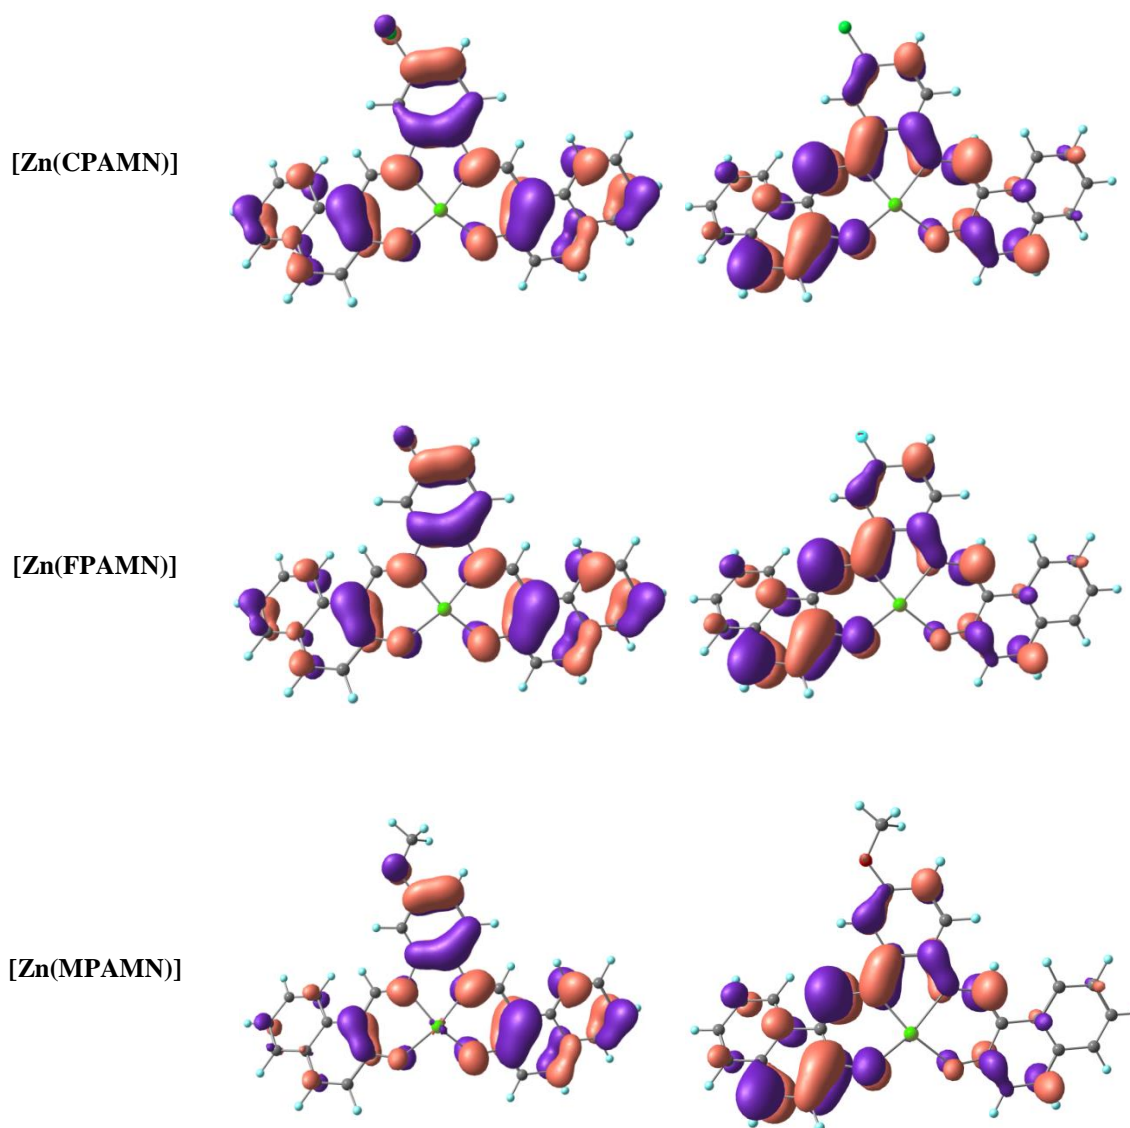

**Table S5. Calculated HOMO, LUMO energies and HLG (in eV) of ligands and complexes**

| Name        | E <sub>HOMO</sub> (eV) | E <sub>LUMO</sub> (eV) | HLG  |
|-------------|------------------------|------------------------|------|
| CPAMN       | -5.25                  | -1.87                  | 3.38 |
| FPAMN       | -5.16                  | -1.81                  | 3.35 |
| MPAMN       | -4.91                  | -1.66                  | 3.25 |
| [Zn(CPAMN)] | -5.35                  | -2.17                  | 3.18 |
| [Zn(FPAMN)] | -5.29                  | -2.12                  | 3.17 |
| [Zn(MPAMN)] | -5.10                  | -1.95                  | 3.15 |

Comment 1

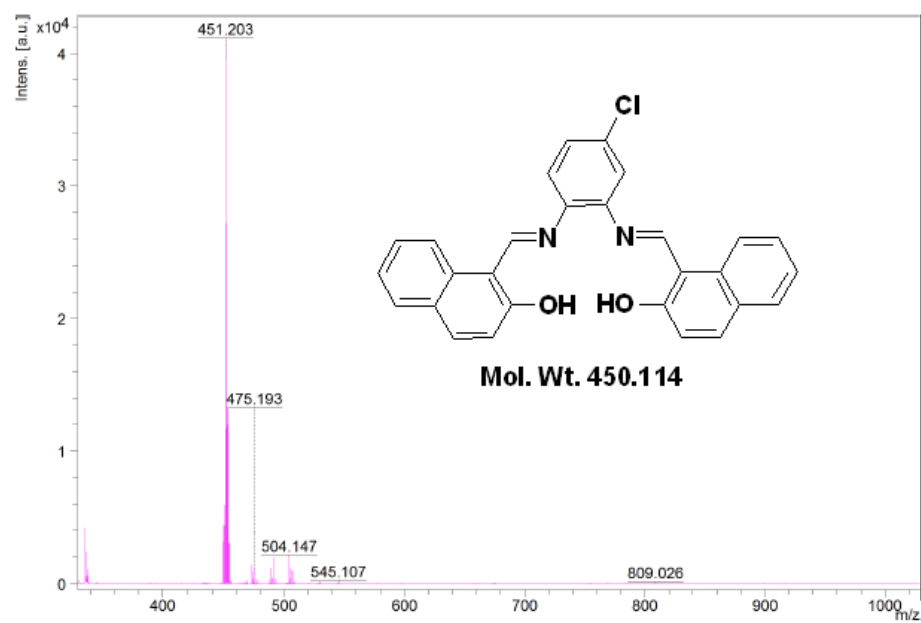**Figure S1. Maldi mass spectrum of CPAMN ligand**

Comment 1

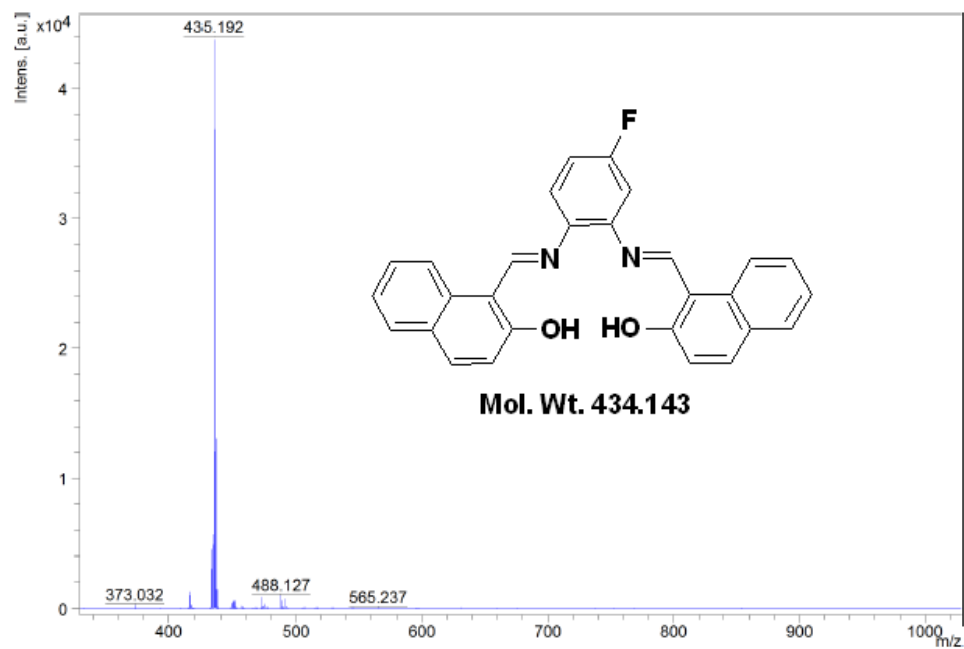**Figure S2. Maldi mass spectrum of FPAMN ligand**

Comment 1

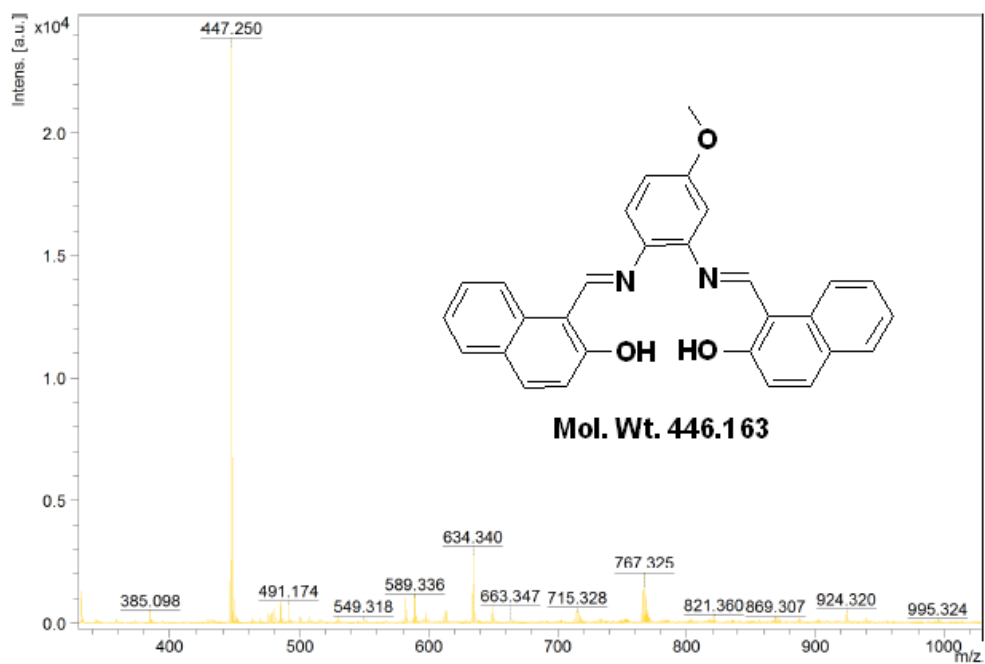**Figure S3. Maldi mass spectrum of MPAMN ligand**

Comment 1

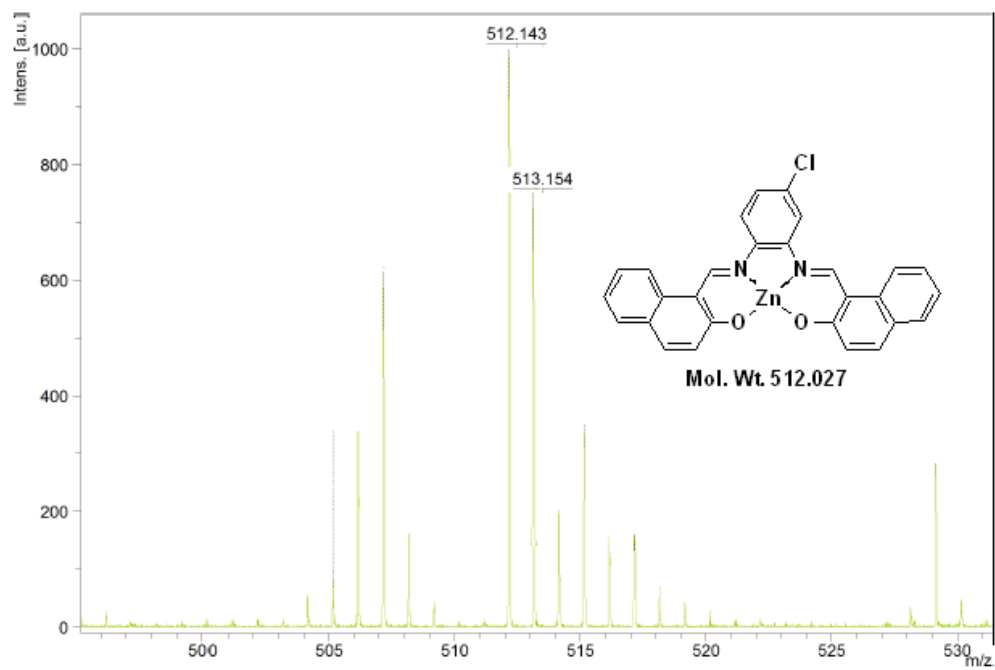

**Figure S4. Maldi mass spectrum of [Zn(CPAMN)] complex**

Comment 1

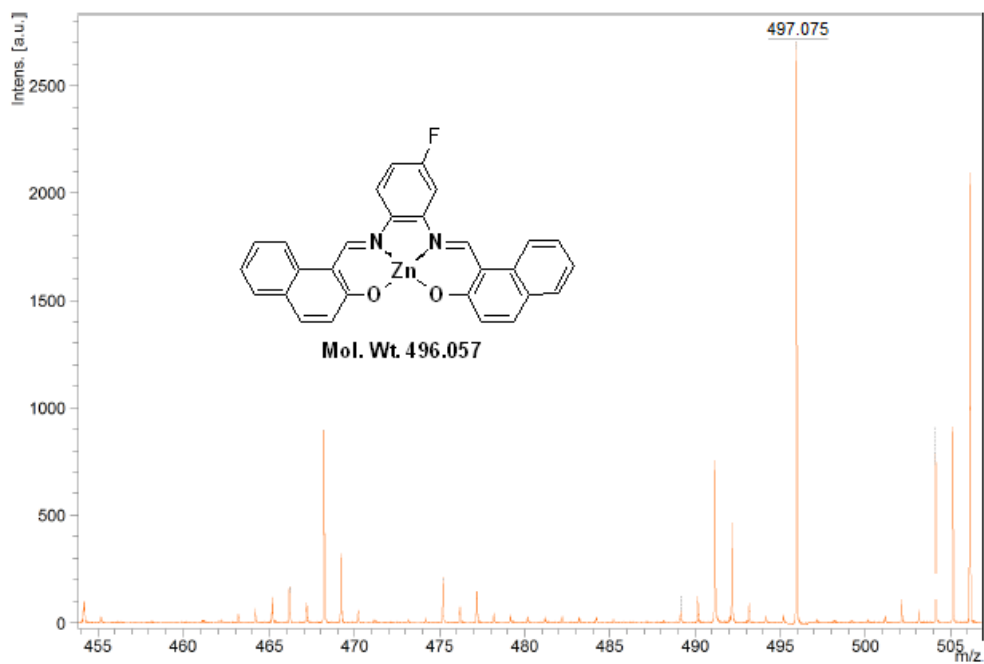

**Figure S5. Maldi mass spectrum of [Zn(FPAMN)] complex**

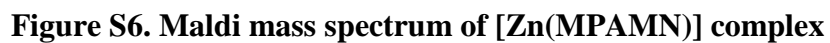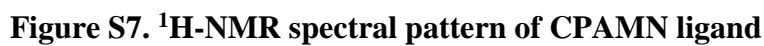

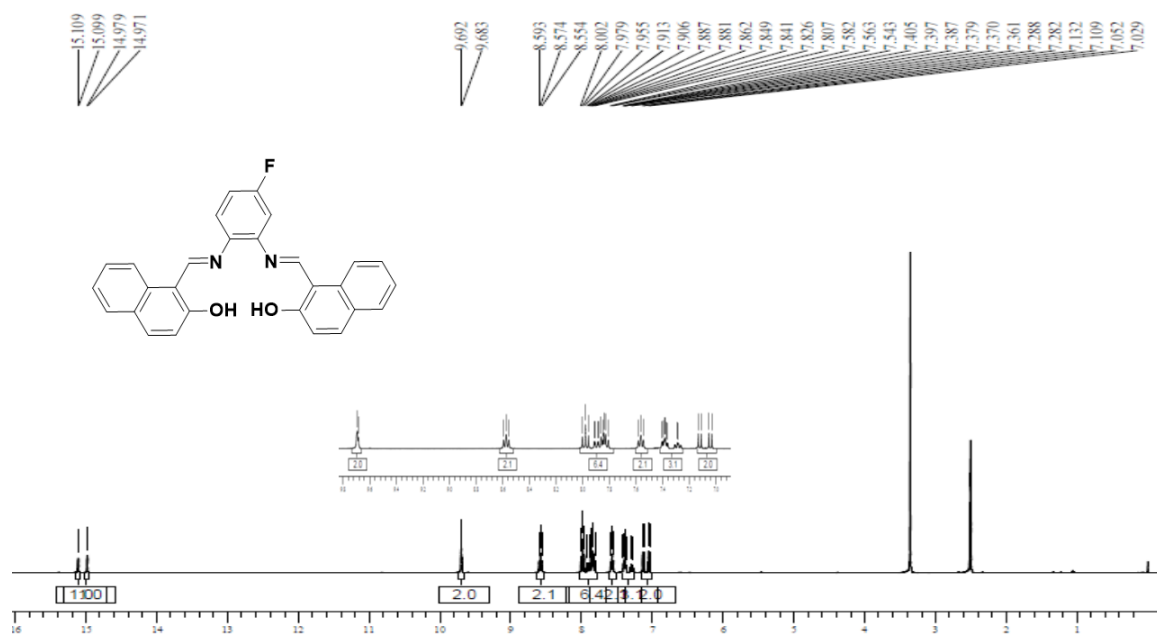

Figure S8. <sup>1</sup>H-NMR spectral pattern of FPAMN ligand

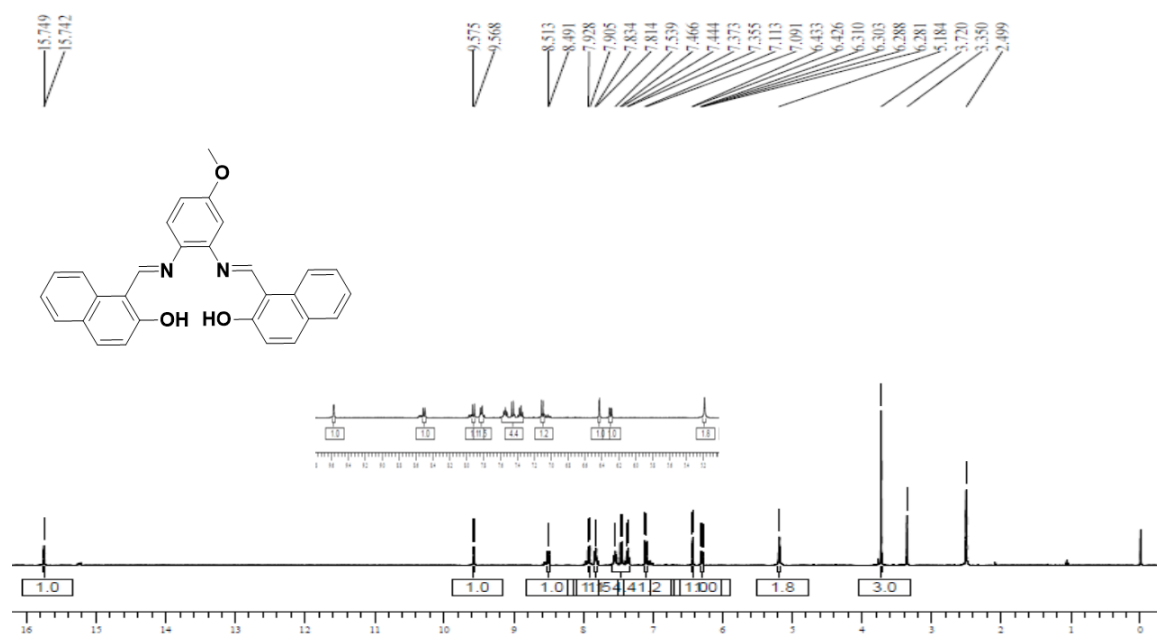

Figure S9. <sup>1</sup>H-NMR spectral pattern of MPAMN ligand

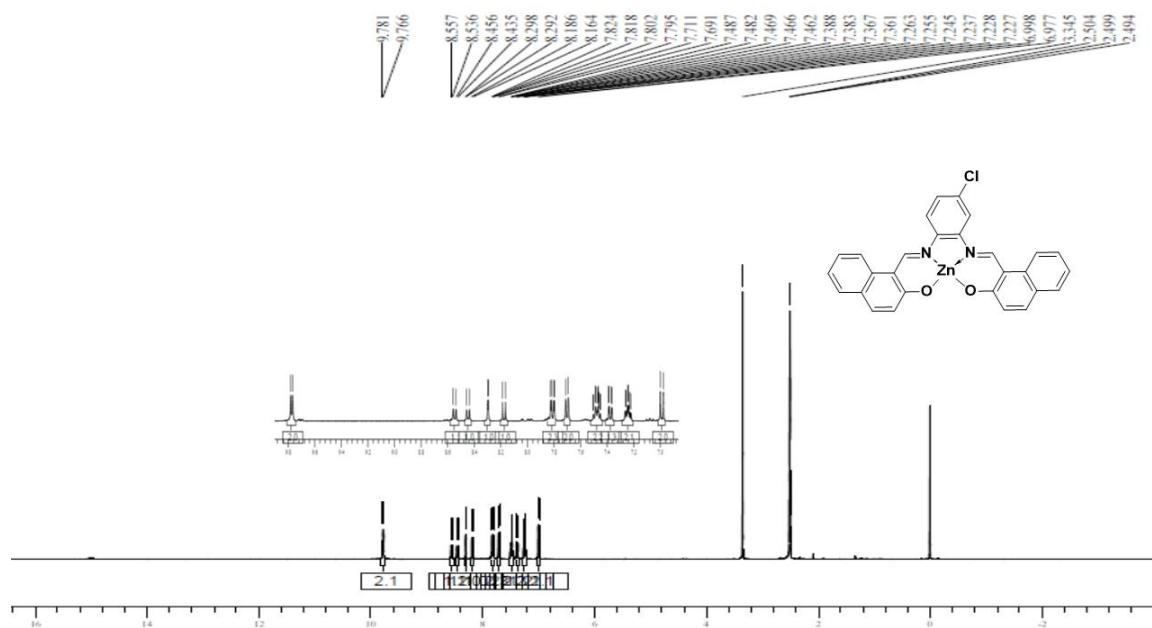

Figure S10.  $^1\text{H}$ -NMR spectral pattern of  $[\text{Zn}(\text{CPAMN})]$  complex

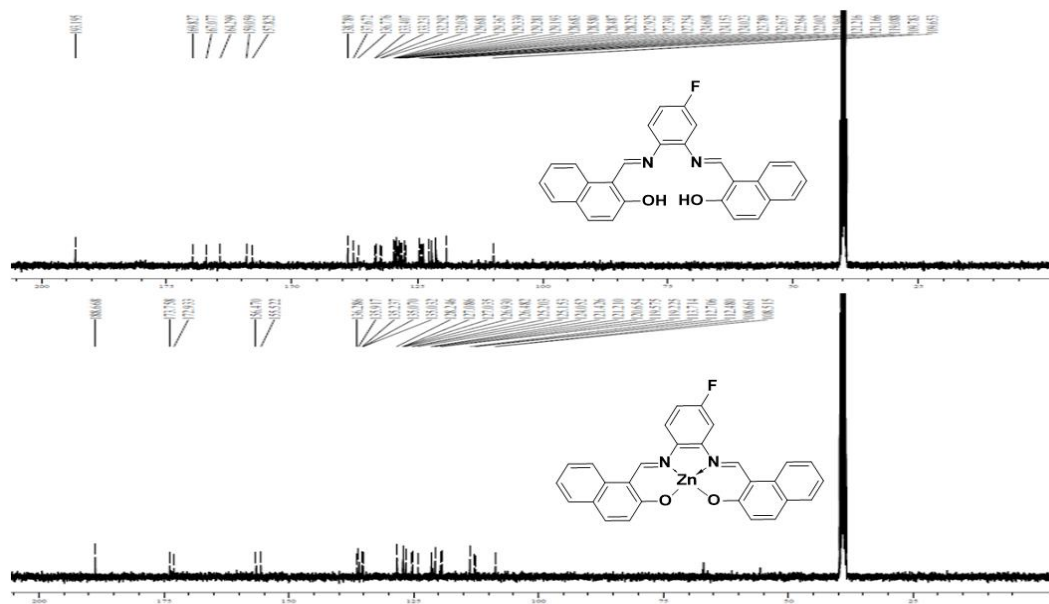

Figure S11.  $^{13}\text{C}$ -NMR spectral pattern of FPAMN ligand and  $[\text{Zn}(\text{FPAMN})]$  complex

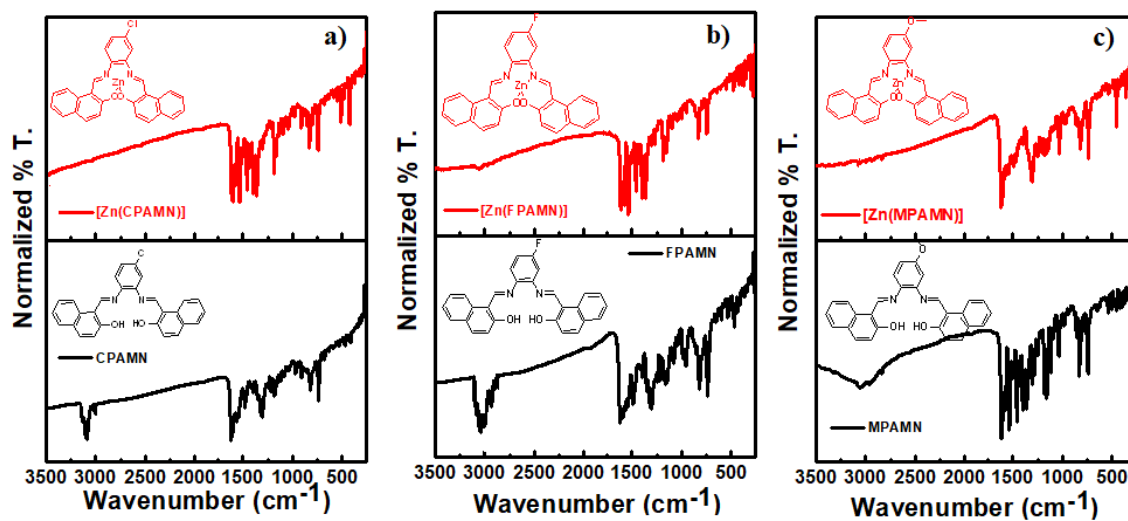

Figure S12. IR spectral images of ligands and Zn (II) complexes

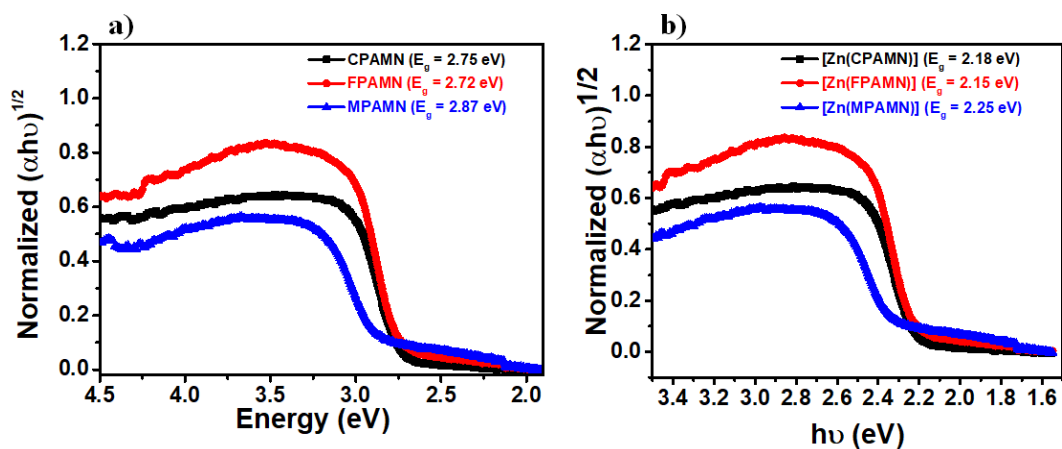

Figure S13. UV-vis-DRS spectra of ligands and Zn (II) complexes

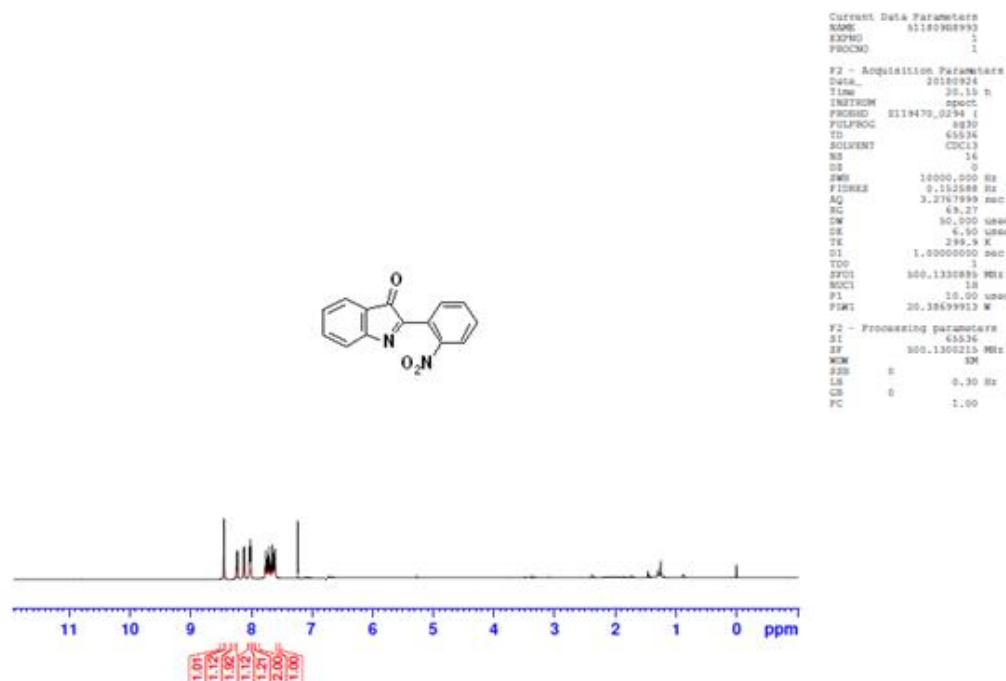

Figure S14.  $^1\text{H}$ -NMR Spectrum of Compound 2a

## MASS REPORT (IICT - NPL)

Sample Name : Compound 5a  
Data File : 201902.59.lcd  
Date Acquired : 2/05/2020 3:45:31 PM

MS Spectrum

Averaged ESI Positive+

Spectrum Mode: Averaged 0.228-0.468 (98-213)

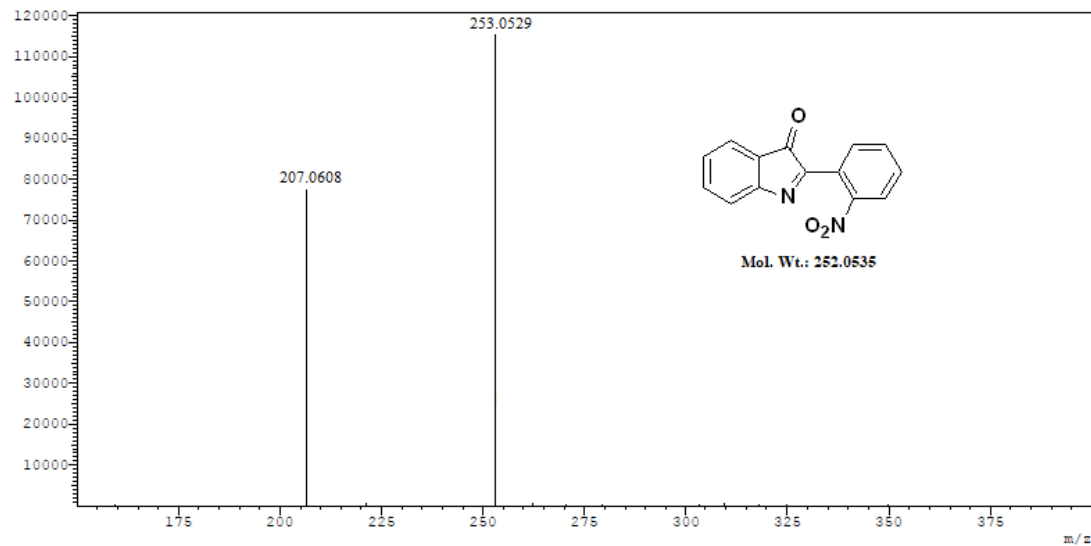

Figure S15 Mass Spectrum of Compound 2a

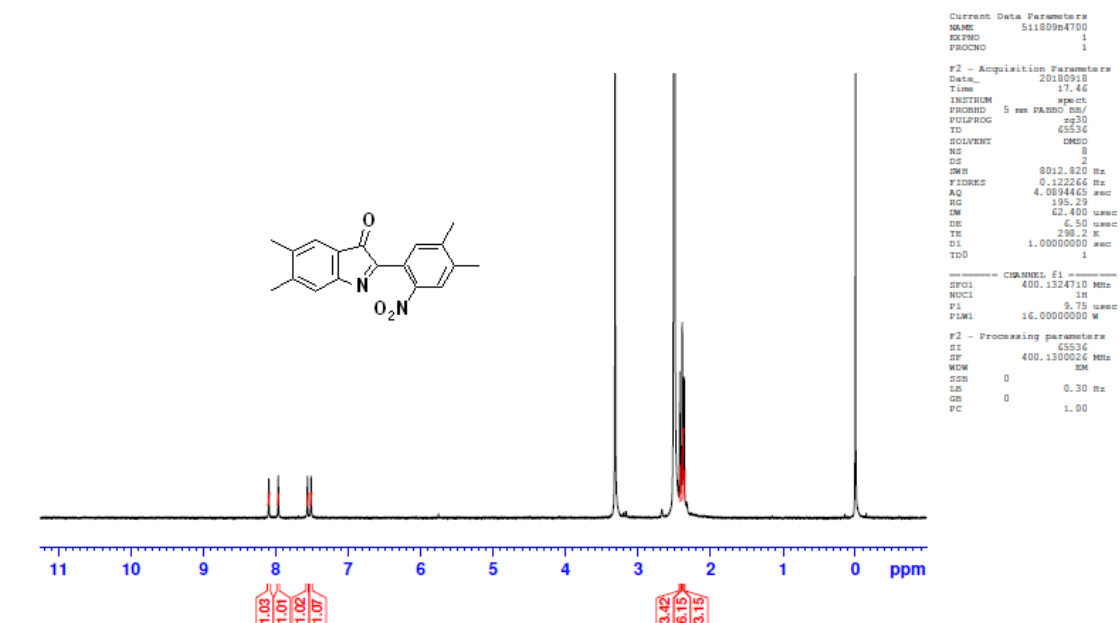

Figure S16. <sup>1</sup>H-NMR Spectrum of Compound 2b

SHIMADZU  
LabSolutions

# MASS REPORT (IICT - NPL)

IICT-DNPC

Sample Name : Compound 5b  
Data File : 201902.70.1cd  
Date Acquired : 2/06/2020 11:25:08 AM

MS Spectrum

AveragedESI Positive+  
Spectrum Mode: Averaged 0.235-0.489 (94-156)

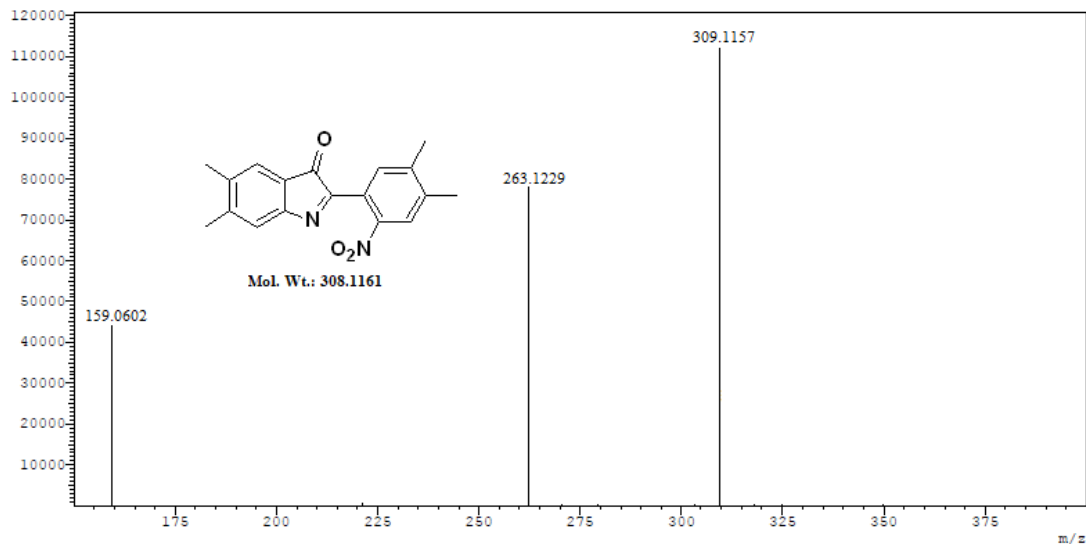

Figure S17. Mass Spectrum of Compound 2b

Sample code: PVS-N-BUTYL  
OSMANIA UNIVERSITY  
VARIAN 400MHz NMR  
Solvent: CDCl<sub>3</sub>  
Date: May 29 2020

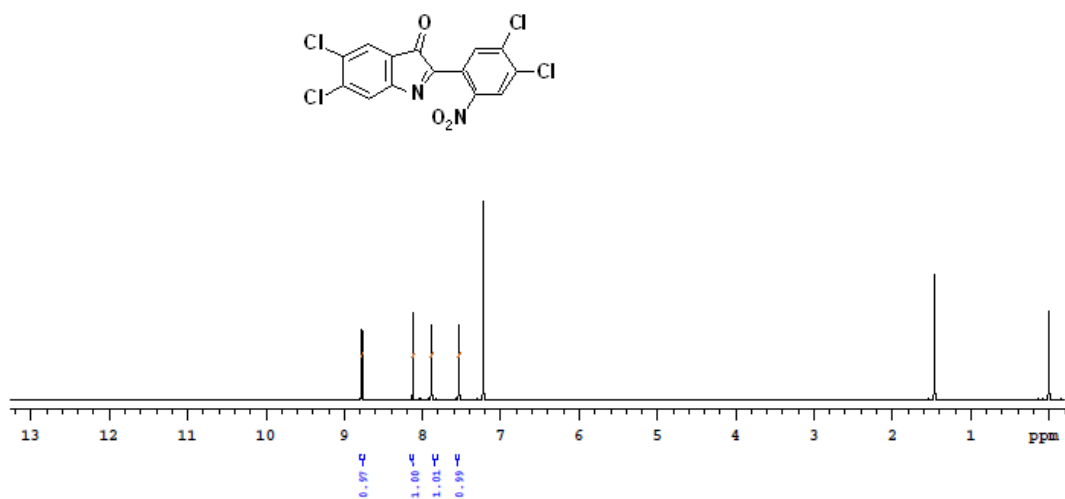

Figure S18. <sup>1</sup>H-NMR spectrum of compound 2c

## MASS REPORT (IICT - NPL)

Sample Name : Compound 5c  
 Data File : 201902.71.lcd  
 Date Acquired : 2/06/2020 11:12:47 AM

MS Spectrum

Averaged ESI Positive+

Spectrum Mode: Averaged 0.234-0.415 (96-189)

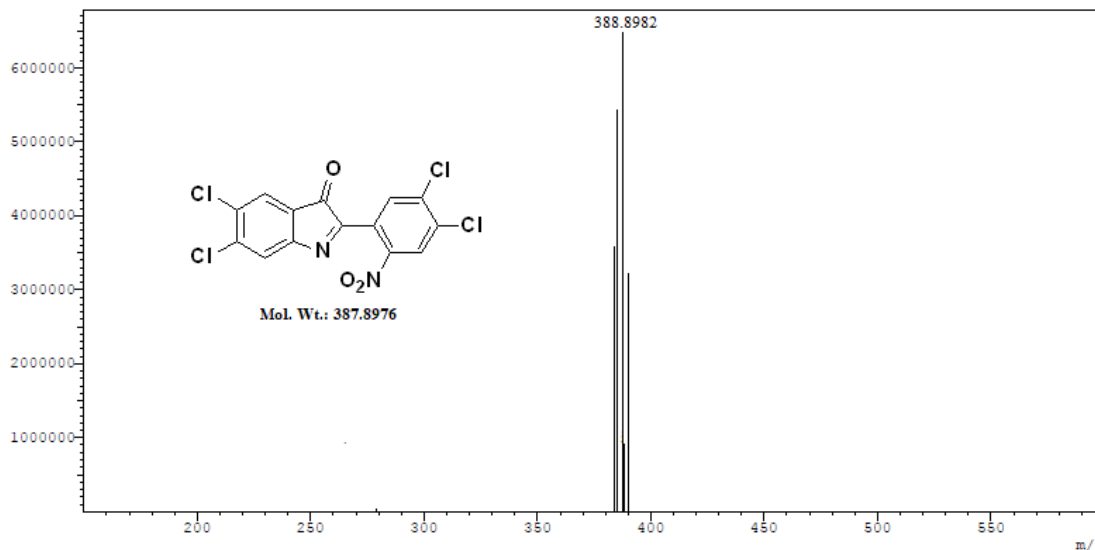

Figure S19. Mass spectrum of compound 2c

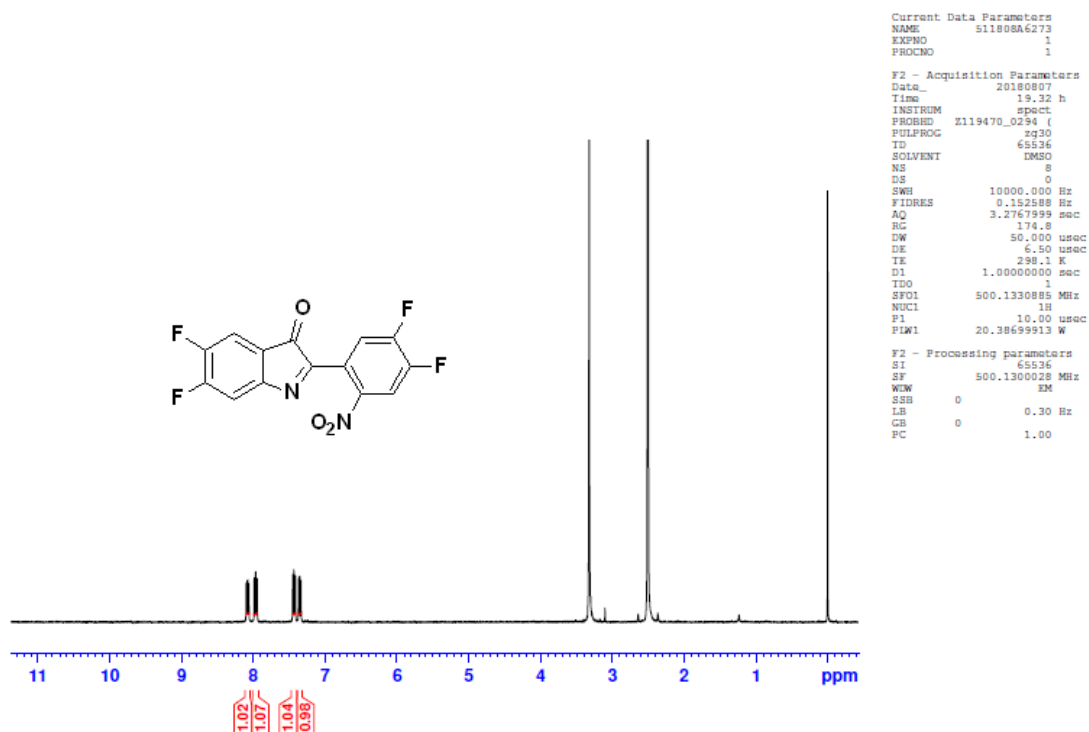

**Figure S20.  $^1\text{H}$ -NMR spectrum of compound 2d**

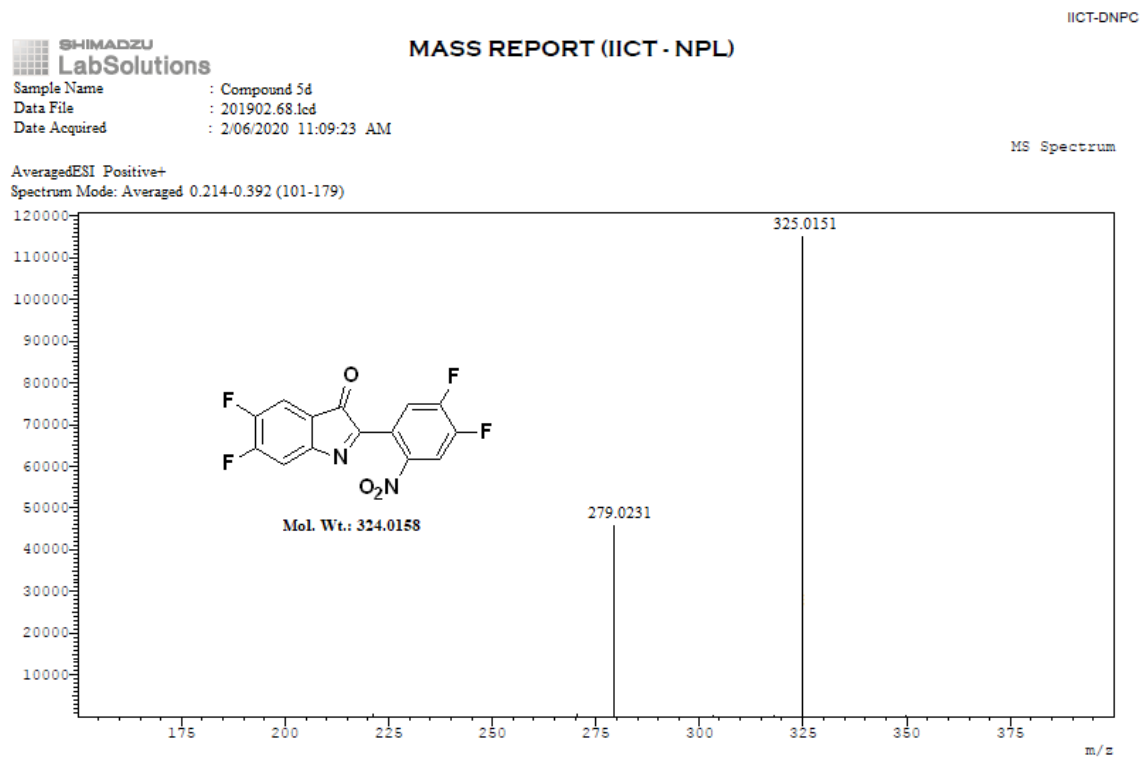

**Figure S21. Mass spectrum of compound 2d**

Sample code: PVS-METHYL  
OSMANIA UNIVERSITY

VARIAN 400MHz NMR  
Solvent: CDCl<sub>3</sub>  
Date: May 29 2020

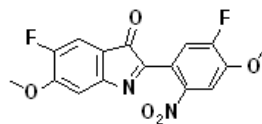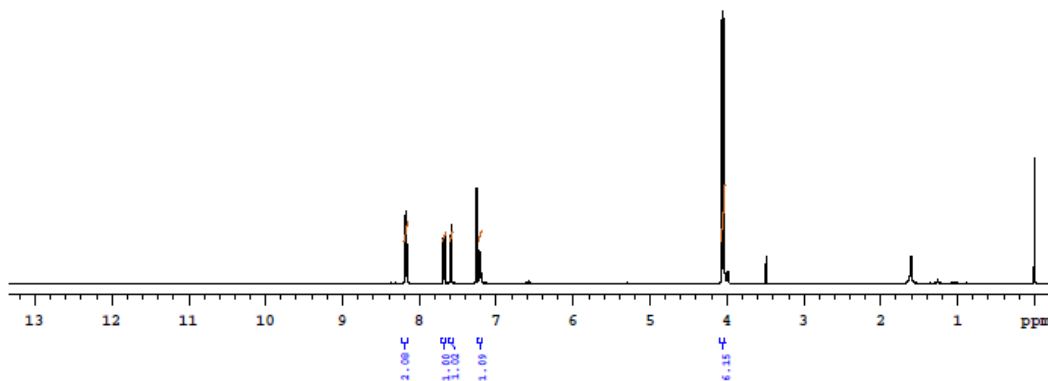

Figure S22. <sup>1</sup>H-NMR spectrum of compound 2e

## MASS REPORT (IICT - NPL)

Sample Name : Compound 5e  
Data File : 201902.66.1cd  
Date Acquired : 2/06/2020 11:04:19 AM

MS Spectrum

Averaged ESI Positive+

Spectrum Mode: Averaged 0.235-0.409 (95-168)

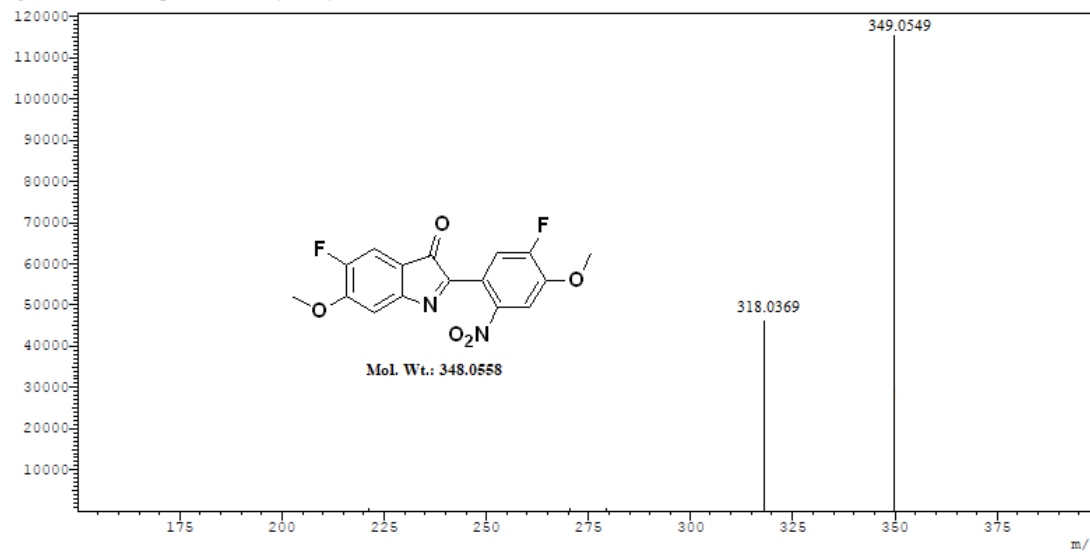**Figure S23. Mass spectrum of compound 2e**

VARIAN 400MHz NMR  
Solvent: CDCl3  
Date: May 29 2020

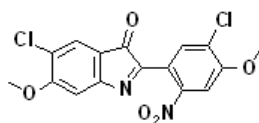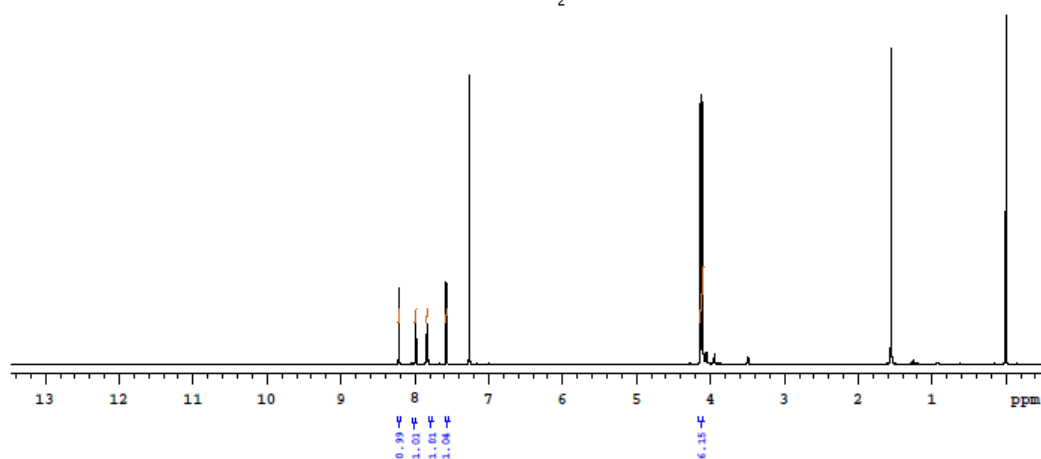

**Figure S24.**  $^1\text{H}$ -NMR spectrum of compound **2f**

IICT-DNPC

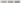

SHIMADZU  
LabSolutions

MASS REPORT (IICT - NPL)

Sample Name : Compound 5f  
Data File : 201902.66.lcd  
Date Acquired : 2/06/2020 10:41:29 AM

MS Spectrum

AveragedESI Positive+  
Spectrum Mode: Averaged 0.246-0.369 (95-164)

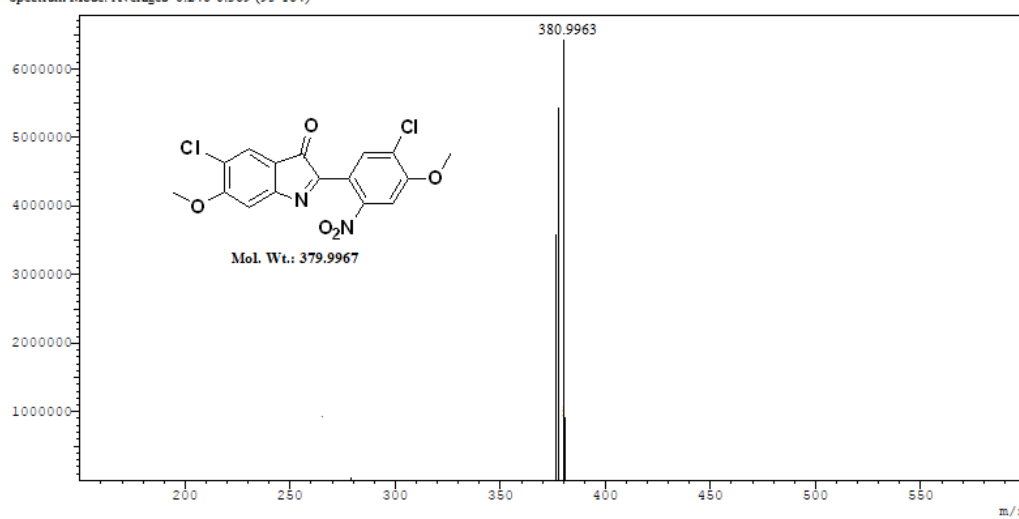

**Figure S25. Mass spectrum of compound 2f**

Sample code: PVS-CF3  
OSMANIA UNIVERSITY  
VARIAN 400MHz NMR  
Solvent: CDCl3  
Date: May 29 2020

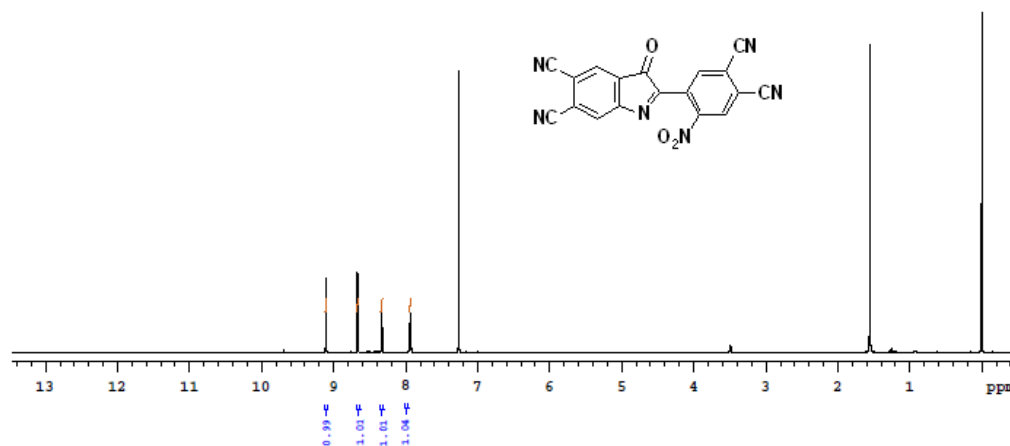

Figure S26. <sup>1</sup>H-NMR spectrum of compound 2g

## MASS REPORT (IICT - NPL)

Sample Name : Compound 5g  
Data File : 201902.651cd  
Date Acquired : 2/06/2020 10:37:09 AM

MS Spectrum

Averaged ESI Positive+

Spectrum Mode : Averaged 0.223-0.339 (94-149)

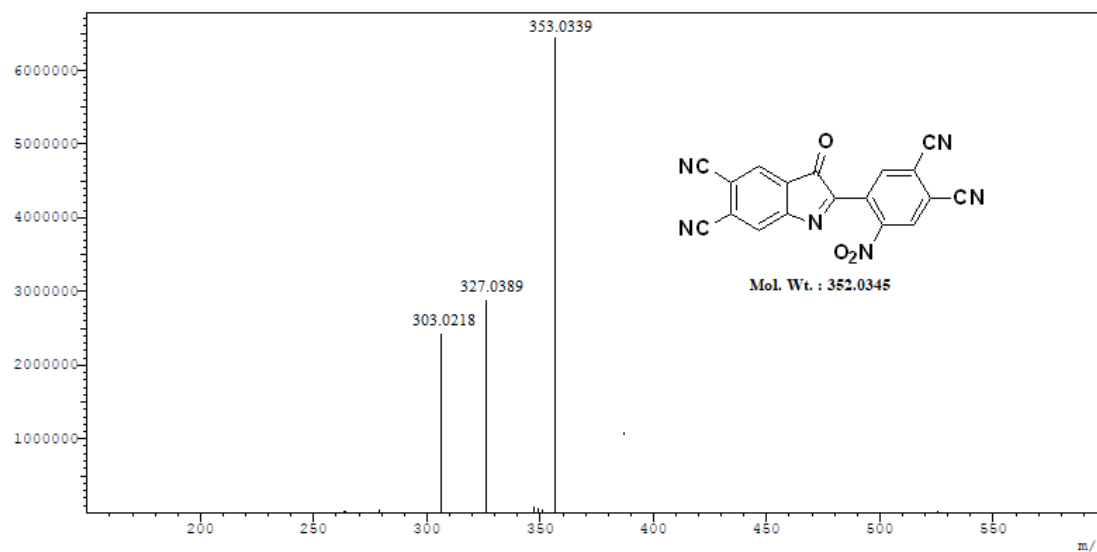**Figure S27. Mass spectrum of compound 2g**

Sample code: PVS-CF3  
OSMANIA UNIVERSITY  
VARIAN 400MHz NMR  
Solvent: CDCl3  
Date: May 29 2020

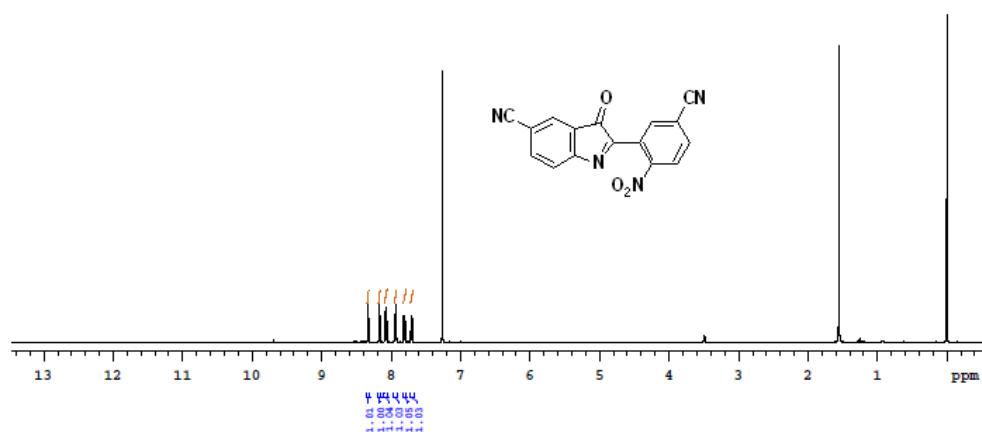

Plotname: PVS-CF3\_PROTON\_01\_plot01

**Figure S28. <sup>1</sup>H-NMR spectrum of compound 2h**

## MASS REPORT (IICT - NPL)

Sample Name : Compound 5h  
Data File : 201902.64.lcd  
Date Acquired : 2/06/2020 10:33:29 AM

MS Spectrum

AveragedESI Positive+

Spectrum Mode : Averaged 0.238-0.368 (96-154)

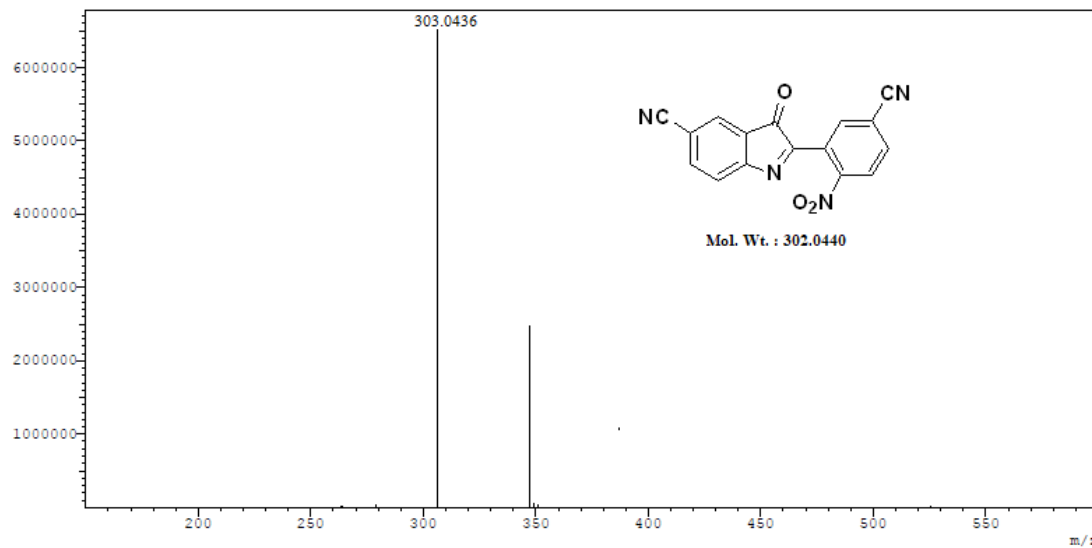**Figure S29. Mass spectrum of compound 2h**

Sample code: PVS-MSTYL  
OSMANIA UNIVERSITY  
VARIAN 400MHz NMR  
Solvent: CDCl<sub>3</sub>  
Date: May 29 2020

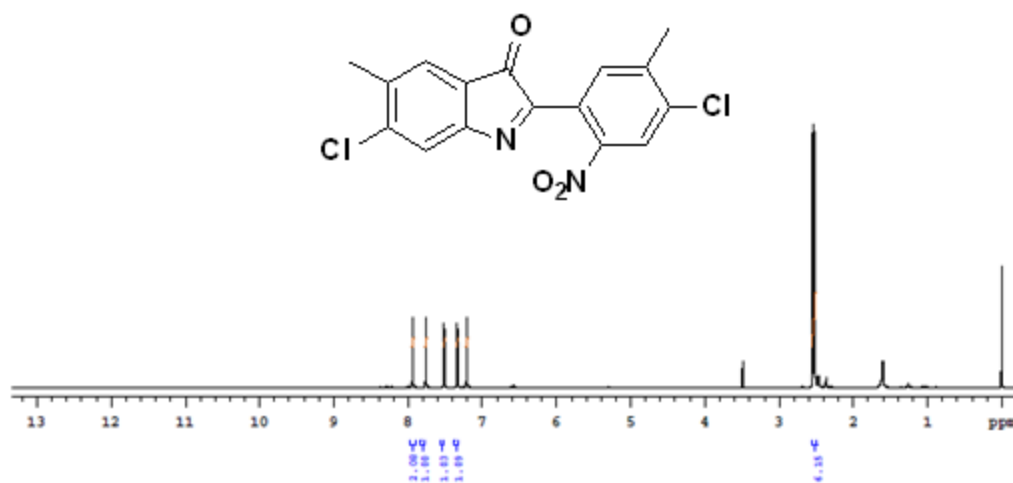

Figure S30. <sup>1</sup>H-NMR Spectrum of compound 2i

Sample Name : Compound 5i  
Data File : 201902.63.Lcd  
Date Acquired : 2/06/2020 10:30:34 AM

MS Spectrum

AveragedESI Positive+

Spectrum Mode : Averaged 0.228-0.329 (91-139)

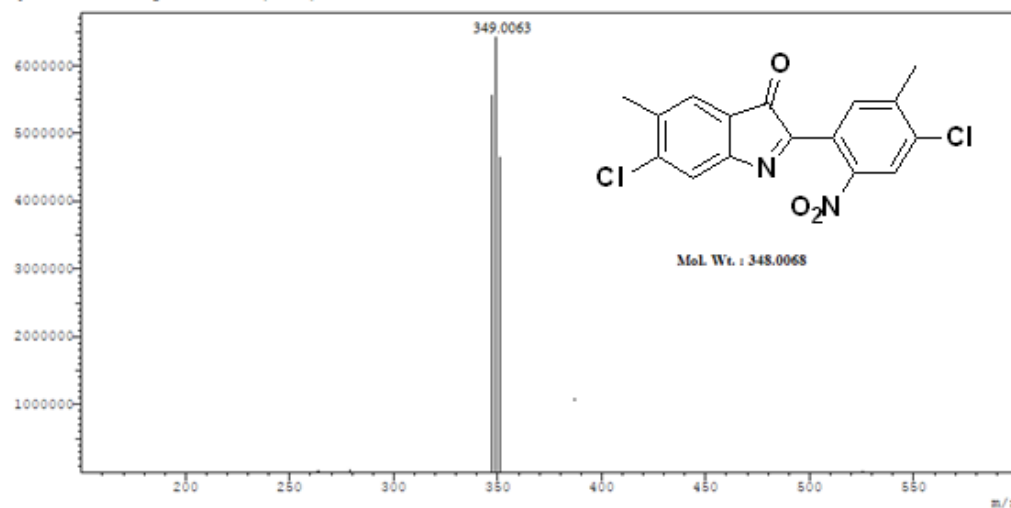

Figure S31. Mass Spectrum of compound 2i

Sample code: PVS-CF3  
OSMANIA UNIVERSITY

VARIAN 400MHz NMR  
Solvent: CDCl3  
Date: May 29 2020

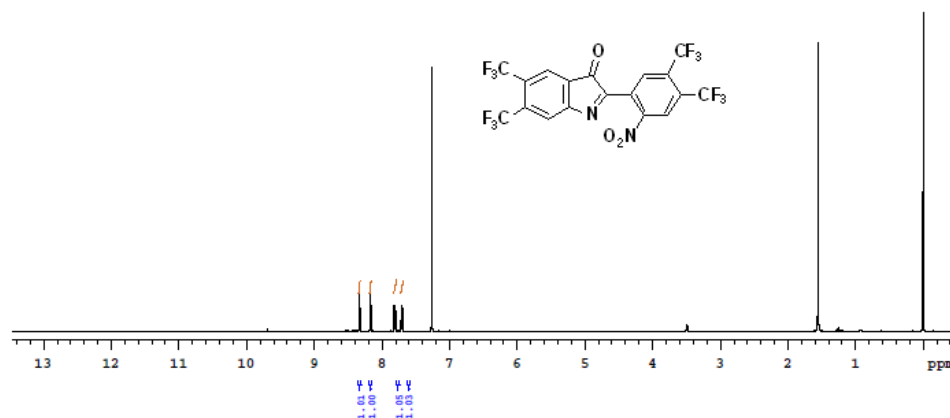

Figure S32. <sup>1</sup>H-NMR spectrum of compound 2j

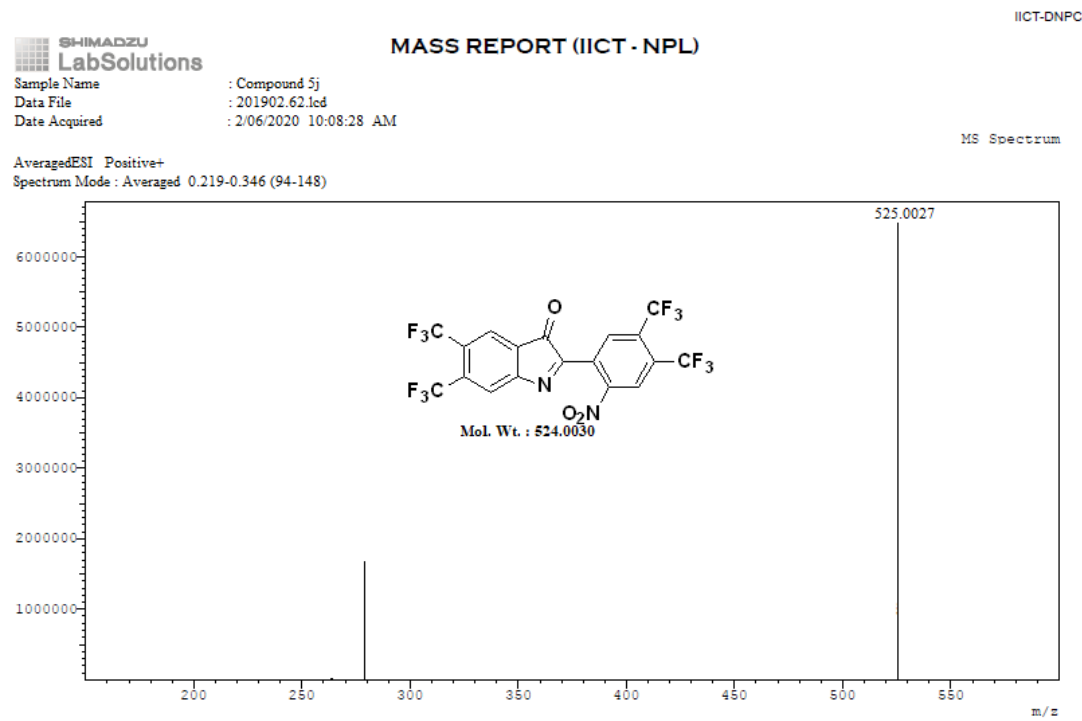

Figure S33. Mass spectrum of compound 2j
